# Supplementary material for: Origin and segregation of the human germline
Source: Life Sci Alliance. 2023 May 22;6(8):e202201706. doi: 10.26508/lsa.202201706 (PMC10203729; doi:10.26508/lsa.202201706)
Supplement: Supplementary file 1 [file LSA-2022-01706_TableS1.xlsx]

## Sheet: Sheet1
Dataset	Paper	Type	Sample type	Cell types
Competent populations	Our dataset	10X	Competent populations	PreME, ME
Embryoid bodies	Our dataset	10X	Embryoid bodies	PSLC,MeLC, AmLC, PGCLC, PGC, 4i, PSC, PGC, DELC
Embryoid bodies	Our dataset	10X	Embryoid bodies 18h and 48h (TFAP2A KO line and parental cell line)	PSLC,MeLC, AmLC, PGCLC
Embryoid bodies	Chen et al. (2019)	10X	Embryoid bodies, competent populations in low competence cell lines	PSLC, MeLC, AmLC, PGCLC, PSC, DELC
Amnoids	Zheng et al. (2019)	10X	Microfluidic amnioids and PSCs	PSLC, MeLC, AmLC, PGCLC, PSC, DELC
2D gastruloids	Minn et al. (2019)	10X	Micropatterned gastruloids (48h)	PSLC, MeLC, AmLC, PGCLC, PSC, DELC
Human embryos	Vento-Tormo et al. (2018)	10X	Trophoblast	Tb
Human embryos	Xiang et al. (2019)	Smart-seq2	In vitro human embryo culture	Epiblast, primitive streak, amnion
Human embryos	Zhou et al. (2019)	Smart-seq2	In vitro human embryo culture	Epiblast, primitive streak
Cynomolgus embryos	Ma et al. (2019)	Smart-seq2	In vitro cynomolgus embryo culture	Epiblast, primitive streak, PGCs, amnion
Cynomolgus embryos	Nakamura et al. (2016)	Smart-seq2	In vivo cynomlgus embryos	Epiblast, primitive streak, PGCs
Human gonadal samples	Guo et al. (2015)	Smart-seq2	Human gonadal PGCs	PGCs
Human gonadal samples	Li et al. (2019)	Smart-seq2	Human gonadal PGCs	PGCs
Human gastrula	Tyser et al. (2020)	Smart-seq2	Human CS7 gastrula	Epiblast, primitive streak, mesoderm, endoderm, amnion, PGCs
Marmoset gastrula	Bergmann et al. (2020)	Smart-seq2	Marmoset CS5, CS6, CS7 gastrula	Epiblast, primitive streak, mesoderm, endoderm, amnion, PGCs
